# Supplementary material for: A NMDA-receptor calcium influx assay sensitive to stimulation by glutamate and glycine/D-serine
Source: PubMed Central journal article supplement (PMC5599507; doi:10.1038/s41598-017-11947-x), 2017-09-14

# **A NMDA-receptor calcium influx assay sensitive to stimulation by glutamate and glycine/D-serine**

Hongqiu Guo<sup>1</sup>, L. Miguel Camargo<sup>1</sup>, Fred Yeboah<sup>1</sup>, Mary Ellen Digan<sup>1</sup>, Honglin Niu<sup>1</sup>, Yue Pan<sup>2</sup>, Stephan Reiling<sup>1</sup>, Gilberto Soler-Llavina<sup>3</sup>, Wilhelm A. Weihofen<sup>1</sup>, Hao-Ran Wang<sup>1</sup>, Y. Gopi Shanker<sup>3</sup>, Travis Stams<sup>1</sup>, and Anke Bill\*<sup>1</sup>

\*Corresponding author: [anke.bill@novartis.com](mailto:anke.bill@novartis.com)

## Affiliations:

<sup>1</sup> Novartis Institutes of Biomedical Research, Chemical Biology and Therapeutics, 250 Massachusetts Avenue, Cambridge, MA 02139.

<sup>2</sup> Novartis Institutes of Biomedical Research, Global Discovery Chemistry, 181 Massachusetts Avenue, Cambridge, MA 02139.

<sup>3</sup> Novartis Institutes of Biomedical Research, Neuroscience, 181 Massachusetts Avenue, Cambridge, MA 02139.

### Supplementary Figure 1

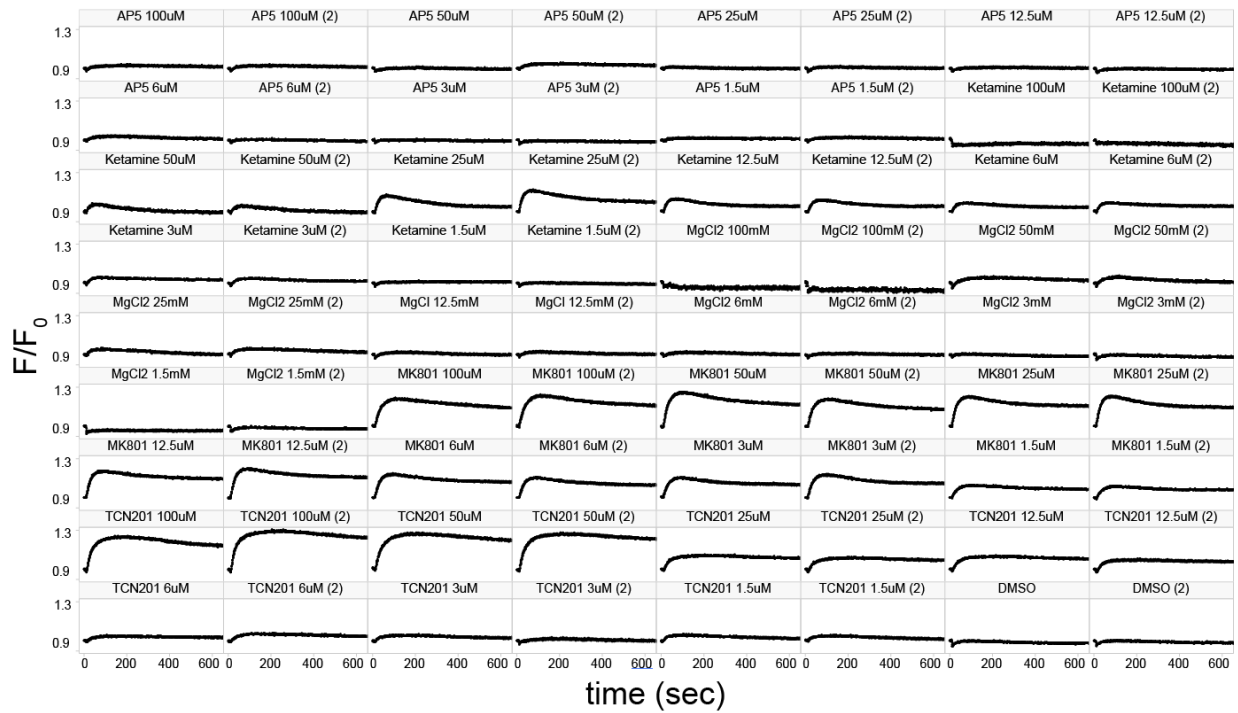

### Supplementary Figure 1 Protection of NMDAR-expressing cells with MDL105,519, but not MK801 or Ketamine, facilitates NMDAR-activity in functional assay

NMDAR-mediated calcium flux in HEK293 cells transduced with baculovirus. NR1/2A-transduced HEK293 cells were treated with the indicated compounds. 16h later, cells were washed three times, loaded with Calcium6 dye and NMDAR-mediated calcium flux was measured after stimulation with 100  $\mu$ M glycine/glutamate. Data represents the raw traces of the fluorescence ratio (fluorescence/baseline fluorescence, F/F<sub>0</sub>) of one representative experiment. The summary of the data across multiple experiments is shown in Figure 2A.

## Supplementary Figure 2

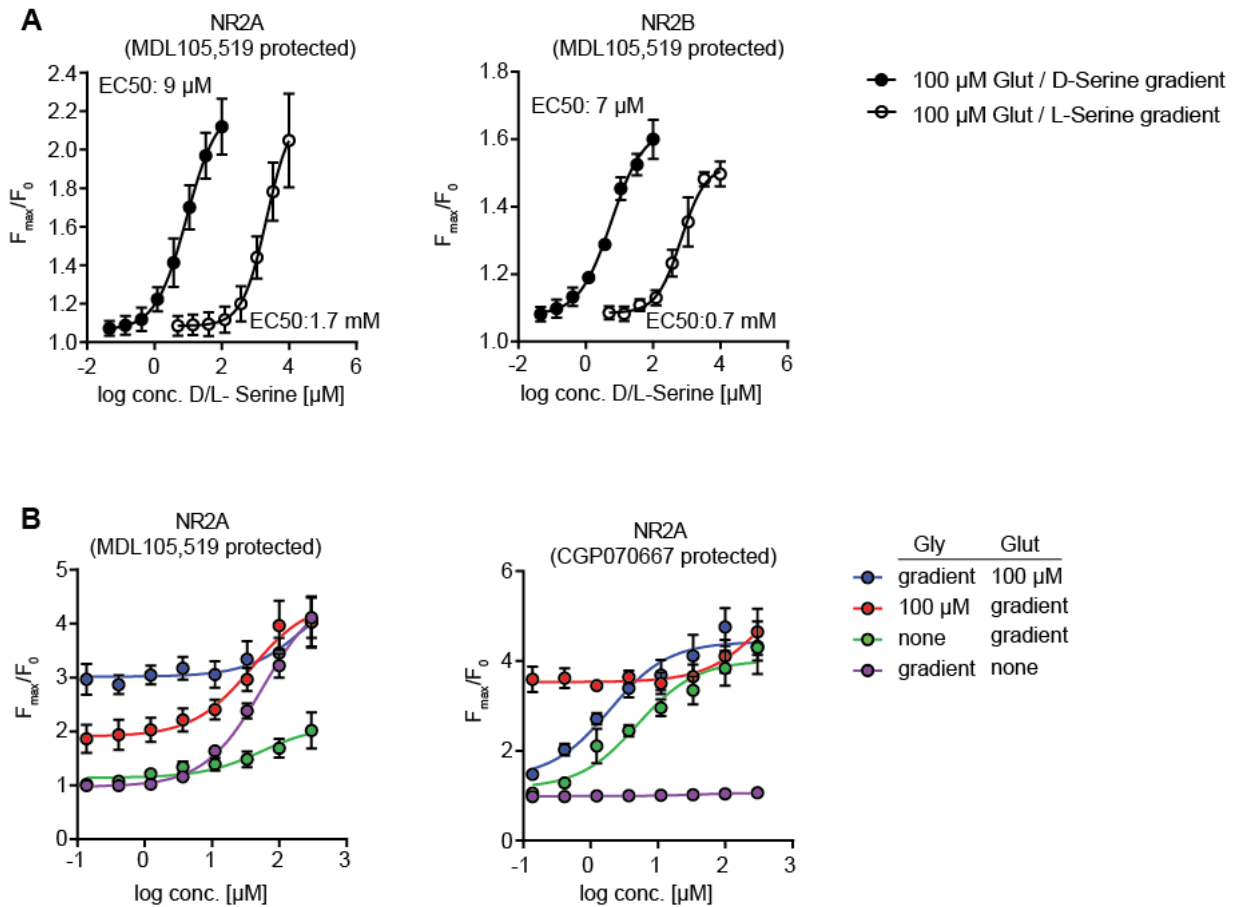

### Supplementary Figure 2 Baculovirus mediated expression of NMDAR recapitulates expected NMDAR biology

**(A)** Sensitivity of NMDAR-mediated calcium flux to D-serine and L-serine. HEK293 cells were transduced with baculovirus encoding NR1 and NR2A or NR2B in the presence of MDL105,519 and NMDAR-mediated calcium flux was measured as described in the presence of varying amounts of D-serine or L-serine and saturating concentration of glutamate. Data represents the mean of the maximal fluorescence ratio  $\pm$  SEM of four experiments.

**(B)** HEK293 cells stably expressing NR1 and NR2A under the control of a tetracycline-inducible promoter were seeded and induced with tetracycline in the presence of MDL105.519 or CGP070667, and NMDAR-mediated calcium flux was measured as previously described after addition of the indicated concentration of glycine and glutamate. Data represents the mean of the maximal fluorescence ratio  $\pm$  SEM of three experiments.

**Supplementary Figure 3**

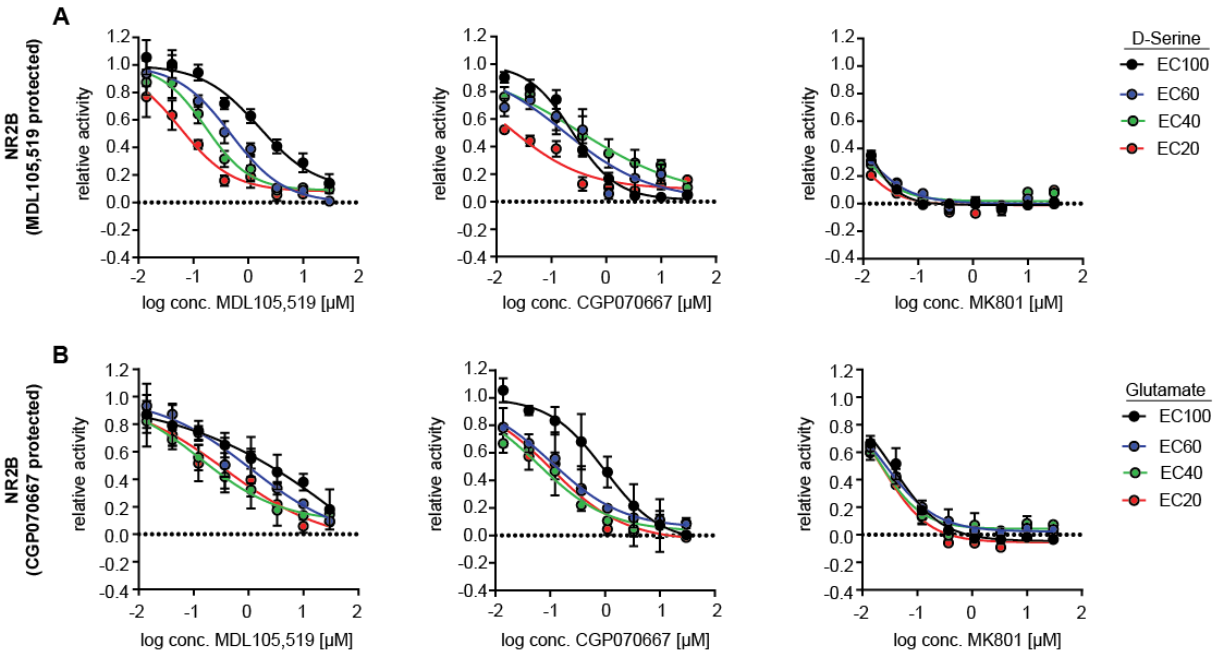

**Supplementary Figure 3 Characterization of the mode of action of NMDAR (NR2B) inhibitors**

**(A-B)** Sensitivity of NR1/2B mediated calcium flux to inhibition by MDL105,519 (first column), CGP070667 (middle column) or MK801 (last column) at different ligand concentrations. HEK293 cells were transduced with baculovirus encoding NR1 and NR2B in the presence of MDL105,519 (A) or CGP070667 (B), and NMDAR-mediated calcium flux was measured as previously described in the presence of the indicated ligand concentrations. The integral of the maximal fluorescence ratio was normalized to the activity measured in the absence of inhibitor (DMSO only) at the respective ligand concentration. Data represents the mean  $\pm$  SEM of three experiments.

## Sequence of pFastBac1-CMV/GW-DEST

TCGAGGGTGGTGGTGGTAGTGGTGGTGGTGGTAGTGGATCAACAAGTTTGTACAAAAAAGCTGAACGAGA  
AACGTA AAAATGATATAAATATCAATATATTA AATTAGATTTTGCATAAAAAACAGACTACATAACTGT  
AAAAACAACATATCCAGTCACTATGGCGGCCGATTAGGCACCCAGGCTTTACACTTTATGCTTCCGG  
CTCGTATAATGTGTGGATTTT GAGTTAGGATCCGGCGAGATTTT CAGGAGCTAAGGAAGCTAAAATGGAG  
AAAAAATCACTGGATATACCACCGTTGATATATCCCAATGGCATCGTAAAGAACATTTT GAGGCATTTT  
AGTCAGTTGCTCAATGTACCTATAACCAGACCGTTCAGCTGGATATTACGGCCTTTTTAAAGACCGTAAA  
GAAAAATAAGCACAAAGTTTTATCCGGCCTTATTACATTCTTGCCCGCTGATGAATGCTCATCCGGAA  
TTCCGTATGGCAATGAAAGACGGTGAGCTGGTGATATGGGATAGTGTTACCCCTGTTACACCGTTTTCC  
ATGAGCAAACGAAACGTTTTCATCGCTCTGGAGTGAATACCACGACGATTTCCGGCAGTTTCTACACAT  
ATATTCGCAAGATGTGGCGTGTACGGTGAAAACCTGGCCTATTTCCCTAAAGGGTTTATTGAGAATATG  
TTTTTCGTCTCAGCCAATCCCTGGGTGAGTTTACCAGTTTTGATTTAAACGTGGCCAATATGGACAAC  
TCTTCGCCCCGTTTTACCATGGGCAAATATTATACGCAAGGCGACAAGGTGCTGATGCCGCTGGCGAT  
TCAGGTTTCATCATGCCGTCTGTGATGGCTTCCATGTCGGCAGAATGCTTAATGAATTACAACAGTACTGC  
GATGAGTGGCAGGGCGGGGCGTAAAGATCTGGATCCGGCTTACTAAAAGCCAGATAACAGTATGCGTATT  
TGCGCGCTGATTTTTGCGGTATAAGAATATACTGATATGTATACCCGAAGTATGTCAAAAAGAGGTGT  
GCTATGAAGCAGCGTATTACAGTGACAGTTGACAGCGACAGCTATCAGTTGCTCAAGGCATATATGATGT  
CAATATCTCCGGTCTGGTAAGCACAAACCATGCAGAATGAAGCCCGTCGTCTGCGTGCCGAACGCTGGAAA  
GCGGAAAATCAGGAAGGGATGGCTGAGGTCGCCCCGTTTTATTGAAATGAACGGCTTTTTGCTGACGAGA  
ACAGGGACTGGTGAATGCAGTTAAGTTTTACACCTATAAAAGAGAGAGCCGTTATCGTCTGTTTGTGG  
ATGTACAGAGTGATATTATTGACACGCCGGGCGACGGATGGTGATCCCCCTGGCCAGTGACCGTCTGCT  
GTCAGATAAAGTCTCCCGTGAACTTTACCCGGTGGTGCATATCGGGGATGAAAGCTGGCGCATGATGACC  
ACCGATATGGCCAGTGCCCGTCTCCGTTATCGGGGAAGAAGTGGCTGATCTCAGCCACCCGCGAAAATG  
ACATCAAAAACGCCATTAACCTGATGTTCTGGGGAATATAAATGTCAGGCTCCCTTATACACAGCCAGTC  
TGCAGGTCGACCATAGTGACTGGATATGTTGTGTTTTACAGTATTATGTAGTCTGTTTTTATGCAAAAT  
CTAATTTAATATATTGATATTTATATCATTTTTACGTTTCTCGTTCAGCTTCTTGTACAAAGTGGTGGGC  
CGCACAGCTGTATACAGTGCAAGCCAGCCAGA ACTCGCCCCGGAAGACCCCGAGGATCTCGAGGCATGC  
GGTACCAAGCTTGTGCGAGAAGTACTAGAGGATCATAATCAGCCATACCACATTTGTAGAGGTTTTACTTG  
CTTTAAAAAACCTCCCACACCTCCCCCTGAACCTGAAACATAAAATGAATGCAATTGTTGTTGTTAACTT  
GTTTATTGCAGCTTATAATGGTTACAATAAAGCAATAGCATCACAAATTTACAAATAAAGCATTTTTT  
TCACTGCATTCTAGTTGTGGTTTGTCCAACTCATCAATGTATCTTATCATGTCTGGATCTGATCACTGC  
TTGAGCCTAGGAGATCCGAACCAGATAAGTGA AATCTAGTTCCAACTATTTTGTCAATTTTAAATTTTCG  
TATTAGCTTACGACGCTACACCCAGTTCCCATCTATTTTGTCACTCTTCCCTAAATAATCCTTAAAAACT  
CCATTTCCACCCCTCCCAGTCCCAACTATTTTGTCCGCCACAGCGGGGCATTTTTCTTCTGTTATGT  
TTTTAATCAAACATCTGCCA ACTCCATGTGACAAACCGTCATCTTCGGCTACTTTTTCTCTGTCACAGA  
ATGAAAATTTTTCTGTCATCTCTCGTTATTAATGTTTGAATTGACTGAATATCAACGCTTATTTGCAG  
CCTGAATGGCGAATGGGACGCGCCCTGTAGCGGCGCATTAAAGCGCGGCGGGTGTGGTGGTTACGCGCAGC  
GTGACCGCTACACTTGCCAGCGCCCTAGCGCCCGCTCCTTTCGCTTCTTCCCTCCTTCTCGCCACGT  
TCGCCGGCTTTCCCGTCAAGCTCTAAATCGGGGGCTCCCTT TAGGGTCCGATTTAGTGCTTTACGGCA  
CCTCGACCCCAAAAACTTGATTAGGGT GATGGTTCACGTAGTGGCCATCGCCCTGATAGACGGTTTTT  
CGCCCTTGTACGTTGGAGTCCACGTTCTTTAATAGTGGACTCTTGTTCCAACTGGAACAACACTCAACC  
CTATCTCGGTCTATTCTTTT GATTTATAAGGGATTTTGGCGATTTCCGGCCTATTGGTTAAAAAATGAGCT  
GATTTAACA AAAATTTAACCGGAATTTTAAACAAAATATTAACGTTTACAATTT CAGGTGGCACTTTTCGG  
GGAAATGTGCGCGGAACCCCTATTTGTTTATTTTCTAATAACATTCAAATATGTATCCGCTCATGAGAC  
AATAACCCTGATAAATGCTTCAATAATATTGAAAAAGGAAGAGTATGAGTATTCAACATTTCCGTGTCGC  
CCTATTCCCTTTTTTGCGGC ATTTTGCTTCTGTTTTTGTCTACCCAGAAACGCTGGTGAAAGTAAAA  
GATGCTGAAGATCAGTTGGGTGCACGAGTGGTTACATCGAACTGGATCTCAACAGCGGTAAGATCCTTG

AGAGTTTTGCCCCGAAGAACGTTTTCCAATGATGAGCACTTTTAAAGTTCTGCTATGTGGCGCGGTATT  
ATCCCGTATTGACGCCGGCAAGAGCAACTCGGTGCGCCATACACTATTCTCAGAATGACTTGGTTGAG  
TACTACCAGTCACAGAAAAGCATCTTACGGATGGCATGACAGTAAGAGAATTATGCAGTGCTGCCATAA  
CCATGAGTGATAAAGCTGCGGCCAACTTACTTCTGACAACGATCGGAGGACCGAAGGAGCTAACCGCTTT  
TTTGACAACATGGGGGATCATGTAACCTGCCTTGATCGTTGGGAACCGGAGCTGAATGAAGCCATACCA  
AACGACGAGCGTGACACCACGATGCCTGTAGCAATGGCAACAACGTTGCGCAAATTAATACTGGCGAAC  
TACTTACTTAGCTTCCGGCAACAATTAATAGACTGGATGGAGGCGGATAAAGTTGCAGGACCACTTCT  
GCGCTCGGCCCTTCCGGCTGGCTGGTTTATTGCTGATAAATCTGGAGCCGGTGAGCGTGGGTCTCGCGGT  
ATCATTGCAGCACTGGGGCCAGATGGTAAGCCCTCCCGTATCGTAGTTATCTACACGACGGGGAGTCAGG  
CAACTATGGATGAACGAAATAGACAGATCGCTGAGATAGGTGCCTCACTGATTAAGCATTGGTAACTGTC  
AGACCAAGTTTACTCATATATACTTTAGATTGATTTAAACTTCATTTTTAATTTAAAGGATCTAGGTG  
AAGATCCTTTTTGATAATCTCATGACCAAAATCCCTAACGTGAGTTTTCGTTCCACTGAGCGTCAGACC  
CCGTAGAAAAGATCAAAGGATCTTCTTGAGATCCTTTTTTCTGCGCGTAATCTGCTGCTTGCAAACAAA  
AAAACCACCGCTACCAGCGGTGGTTTGGTTGCCGGATCAAGAGCTACCAACTCTTTTTCCGAAGGTAAC  
GGCTTACGAGAGCGCAGATACCAAATACTGTCCTTAGTGTAGCCGTAGTTAGGCCACCACTTCAAGA  
ACTCTGTAGCACCGCTACATACCTCGCTCTGCTAATCCTGTTACCAAGTGGCTGCTGCCAGTGGCGATAA  
GTCGTGTCTTACCGGGTTGACTCAAGACGATAGTTACCGGATAAGGCGCAGCGGTGCGGCTGAACGGGG  
GGTTCGTGCACACAGCCCAGCTTGGAGCGAACGACCTACACCGAACTGAGATACCTACAGCGTGAGCATT  
GAGAAAGCGCCACGCTTCCGAAGGGAGAAAGGCGGACAGGTATCCGGTAAGCGGCAGGGTCCGAACAGG  
AGAGCGCACGAGGGAGCTTCCAGGGGGAAACGCCTGGTATCTTTATAGTCCTGTGCGGTTTCGCCACCTC  
TGACTTGAGCGTCGATTTTTGTGATGCTCGTCAGGGGGCGGAGCCTATGGAAAACGCCAGCAACCGGG  
CCTTTTTACGGTTCCTGGCCTTTTGTGCTGACATGTTCTTTCTGCGTTATCCCTGATTC  
TGTGGATAACCGTATTACCGCTTTGAGTGAGCTGATACCGCTCGCCGACGCCAACGACCGAGCGCAGC  
GAGTCAGTGAGCGAGGAAGCGGAAGAGCGCCTGATGCGGTATTTTCTCCTTACGCATCTGTGCGGTATTT  
CACACCGCAGACCAGCCGCTAACCTGGCAAATCGGTTACGGTTGAGTAATAAATGGATGCCCTGCGTA  
AGCGGGTGTGGGCGGACAATAAAGTCTTAAACTGAACAAAATAGATCTAACTATGACAATAAAGTCTTA  
AACTAGACAGAATAGTTGTAAACTGAAATCAGTCCAGTTATGCTGTGAAAAAGCATACTGGACTTTTGT  
ATGGCTAAAGCAAACCTTTCATTTTTCTGAAGTGCAAATTGCCCGTCGTATTAAGAGGGGGCGTGGCCAAG  
GGCATGGTAAAGACTATATTCGCGCGTGTGACAATTTACCGAACAACTCCGCGGCCGGGAAGCCGATC  
TCGGCTTGAACGAATTGTTAGGTGGCGGACTTGGGTGATATCAAAGTGCATCACTTCTTCCCGTATGC  
CCAACCTTGTATAGAGAGCCACTGCGGGATCGTCACCGTAATCTGCTTGCACGTAGATCACATAAGCACC  
AAGCGCGTTGGCCTCATGCTTGAGGAGATTGATGAGCGCGGTGGCAATGCCCTGCCTCCGGTGTGCGCG  
GAGACTGCGAGATCATAGATATAGATCTCACTACGCGGCTGCTCAAACCTGGGCAGAACGTAAGCCGCGA  
GAGCGCCAACAACCGCTTCTGGTGAAGGCAAGCGCGATGAATGTCTTACTACGGAGCAAGTTCCC  
GAGGTAATCGGAGTCCGGCTGATGTTGGGAGTAGGTGGCTACGTCTCCGAACCTACGACCGAAAAGATCA  
AGAGCAGCCCGCATGGATTTGACTTGGTCAGGGCCGAGCCTACATGTGCGAATGATGCCATACTTGAGC  
CACCTAACTTTGTTTTAGGGCGACTGCCCTGCTGCGTAACATCGTTGCTGCTGCGTAACATCGTTGCTGC  
TCCATAACATCAAACATCGACCCACGGCGTAACGCGCTTGTGCTTGGATGCCCCGAGGCATAGACTGTAC  
AAAAAACAGTCATAACAAGCCATGAAAACCGCCACTGCGCCGTTACCACCGCTGCGTTCGGTCAAGGTT  
CTGGACCAGTTGCGTGAGCGCATACGCTACTTGCATTACAGTTTACGAACCGAACAGGCTTATGTCAACT  
GGGTTTCGTGCCTTCATCCGTTTCCACGGTGTGCGTCACCCGCAACCTTGGGCAGCAGCGAAGTCGAGGC  
ATTTCTGCTGCTGGCTGGCGAACGAGCGCAAGGTTTCGGTCTCCACGCATCGTCAGGCATTGGCGGCCTTG  
CTGTTCTTCTACGGCAAGGTGCTGTGCACGGATCTGCCCTGGCTTCCAGGAGATCGGAAGACCTCGGCCGT  
CGCGGCGCTTCCGGTGGTGTGACCCCGGATGAAGTGGTTTCGCATCCTCGGTTTTCTGGAAGGCGAGCA  
TCGTTTGTTCGCCAGGACTCTAGCTATAGTTCTAGTGGTTGGCTACCCTACGTCGACGAGCTCACTAGT  
TCAATATTGGCCATTAGCCATATTATTATTGGTTATATAGCATAAATCAATATTGGCTATTGGCCATTG  
CATACGTTGTATCTATATCATAATATGTACATTTATATTGGCTCATGTCCAATATGACCGCCATGTTGGC  
ATTGATTATTGACTAGTTAATAAGTAATCAATTACGGGGTCATTAGTTCATAGCCCATATATGGAGTT

CCGCGTTACATAACTTACGGTAAATGGCCCGCCTGGCTGACCGCCCAACGACCCCGCCATTGACGTCA  
ATAATGACGTATGTTCCCATAGTAACGCCAATAGGGACTTTCATTGACGTCAATGGGTGGAGTATTTAC  
GGTAAACTGCCCACTTGGCAGTACATCAAGTGTATCATATGCCAAGTCCGCCCCCTATTGACGTCAATGA  
CGGTAAATGGCCCGCCTGGCATTATGCCCAGTACATGACCTTACGGGACTTTCCTACTTGGCAGTACATC  
TACGTATTAGTCATCGCTATTACCATGGTGATGCGGTTTTGGCAGTACACCAATGGGCGTGGATAGCGGT  
TTGACTCACGGGGATTTCCAAGTCTCCACCCCATTGACGTCAATGGGAGTTTGTGGCACCAAAATCA  
ACGGGACTTTCAAAATGTCGTAACAACTGCGATCGCCCGCCCCGTTGACGCAAATGGGCGGTAGGCGTG  
TACGGTGGGAGGTCTATATAAGCAGAGCTCGTTTAGTGAACCGTCAGATCACTAGAAGCTTTATTGCGGT  
AGTTTATCACAGTTAAATTGCTAACGCAGTCAGTGCTTCTGACACAACAGTCTCGAACTTAAGCTGCAGT  
GACTCTCTTAAGGTAGCCTTGCAAGTTGGTCGTGAGGCACTGGGCAGGTAAGTATCAAGGTTACAAGA  
CAGGTTTAAGGAGACCAATAGAACTGGGCTTGTGAGACAGAGAAGACTCTTGC GTTTCTGATAGGCAC  
CTATTGGTCTTACTGACATCCACTTTCCTTCTCTCCACAGGTGTCCACTCCAGTTCAATTACAGCTC  
TTAAGGCTAGAGTACTTAATACGACTCACTATAGGCTAGCCAGCTTGAAGCAAGCCTCCC

## Western blot images

NR1 (full blot image)

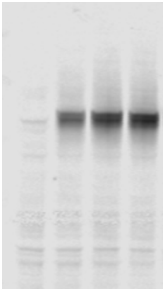

Hsc70 loading control for NR1 (full blot image, not shown in figure)

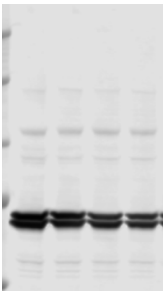

NR2A (full blot image)

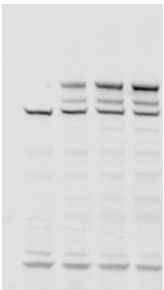

Hsc70 loading control for NR2A (full blot image)

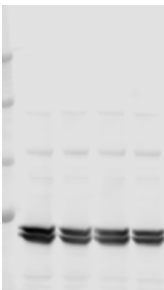

Supplement: 41598_2017_11947_MOESM1_ESM.pdf [file 41598_2017_11947_MOESM1_ESM.pdf]
